# Supplementary material
Source: PubMed Central journal article supplement (PMC3457338)

**Supporting information for:**

**$\beta$ 1 Integrin NPxY Motifs Regulate Kidney Collecting Duct Development and Maintenance by Induced-Fit Interactions with Cytosolic Proteins**

Sijo Mathew<sup>1</sup>, Zhenwei Lu<sup>2</sup>, Riya J. Palamuttam<sup>1</sup>, Glenda Mernaugh<sup>1</sup>, Arina Hadziselimovic<sup>2</sup>, Jiang Chen<sup>2</sup>, Nada Bulus<sup>1</sup>, Leslie S. Gewin<sup>7,1</sup>, Markus Voehler<sup>2</sup>, Alexander Meves<sup>8,10</sup>, Christoph Ballestrem<sup>9</sup>, Reinhard Fässler<sup>8</sup>, Ambra Pozzi<sup>1,3,7</sup>, Charles R. Sanders<sup>2,5,6</sup>, Roy Zent<sup>1,3,4,5,7</sup>

<sup>1</sup>Division of Nephrology and Hypertension, Department of Medicine, <sup>2</sup>Department of Biochemistry, <sup>3</sup>Department of Cancer Biology, <sup>4</sup>Department of Cell and Developmental Biology, <sup>5</sup>Center for Matrix Biology, <sup>6</sup>Center for Structural Biology, Vanderbilt University School of Medicine, Nashville, <sup>7</sup>Veterans Affairs Hospital, Nashville, Tennessee 37232, United States, <sup>8</sup>Department of Molecular Medicine, Max Planck Institute of Biochemistry, 82152, Martinsried, Germany, Department of Biochemistry Department of Medicine, Division of Nephrology, <sup>9</sup>Faculty of Life Sciences, University of Manchester, Manchester, M13 9PT, England, <sup>10</sup>Current Address Department of Dermatology, Mayo Clinic, Rochester, MN, 55905, United States.

**Contents:**

Captions for Supporting Figures 1-5

Supporting Figures 1-5

Supporting Tables 1-3

**Supporting Figure 1. YY/AA and YY/FF mutants respond differently to FGF-10.**

Wild type and mutant CD cells were allowed to adhere to collagen I for 1 hour, after which they were treated with FGF-10 for various times. The cells were then lysed and 20  $\mu$ g of total cell lysates were analyzed by Western blot for levels of pAKT and pERK. Immunoblots of total AKT and ERK are shown to verify equal protein loading. A representative blot from 3 independent experiments is shown. The increases in intensity of phosphorylated proteins were quantified using Image-J software and expressed as fold increase relative to untreated cells.

**Supporting Figure 2.** The contralateral kidneys of WT and YY/FF mice removed 5 days after UUO injury were subjected to Trichrome Blue staining. There was minimal staining in either phenotype (100X).

**Supporting Figure 3.** Overlaid spectra comparing the  $^1\text{H},^{15}\text{N}$ -TROSY spectra of WT  $\beta$ 1 TM/CTD (black spectrum) to that of the YY/AA mutant (red spectrum) or the YY/FF mutant (blue spectrum). The  $^1\text{H},^{15}\text{N}$ -TROSY spectra were collected using a 600MHz Bruker NMR Avance-III spectrometer at 298K, pH 6.5 in DMPC/D7PC bicelles ( $q=0.3$ ). These spectra show only minor differences between the spectra of the wild type and mutant proteins. The non-overlaid spectra of the WT and mutant proteins are shown in Figure 5 of the paper.

**Supporting Figure 4.** Far-UV circular dichroism spectrum of the WT integrin  $\beta 1$  TM/CTD. This was acquired at 298K using a JASCO spectropolarimeter (J-810) and a 0.1 cm pathlength sample containing 0.05 mM  $\beta 1$  TM/CTD in sodium phosphate buffer pH 7.2 with 2% DMPC/D7PC bicelles,  $q=0.3$ , 298K. The  $\alpha$ -helical content of the protein in this sample was calculated from this spectrum to be 84.7% using the K2D2 program (*K2D2: Estimation of Protein Secondary Structure from Circular Dichroism Spectra* Carolina Perez-Iratxeta, Miguel A Andrade-Navarro (2008) *BMC Structural Biology* **8**, p. 25).

**Supporting Figure 5.**  $^1\text{H}$ ,  $^{15}\text{N}$ -TROSY spectra illustrating the titration of the U- $^{15}\text{N}$ -labeled  $\beta 1$  TM/CTD mutants with unlabeled integrin  $\alpha 2$  TM/CTD, which was carried out in DMPC/D7PC bicelles ( $q$  0.3, pH 6.5, 298K). The initial concentration of integrin  $\beta 1$  WT and mutants were 1.0 mM. The integrin  $\alpha 2$  TM/CTD was titrated into this sample from a 2.5mM stock solution up through a 2.5 molar excess of  $\alpha 2$  relative to  $\beta 1$ . The overlaid spectra are: Back (0 mol:mol), orange (0.5), blue (1.0), yellow (1.5) green (2.0) and red (2.5 mol  $\alpha 2$ :mol  $\beta 1$ ). Changes in the chemical shifts of peaks were interpreted as reporting on complex formation (see Figure 7B in the paper). **(A)** Titration of the  $\beta 1$  TM/CTD YY/AA mutant. **(B)** Titration of the  $\beta 1$  TM/CTD YY/FF mutant.

**Supporting Table 1.** Backbone NMR resonance assignments for the membrane distal CTD of WT  $\beta$ 1 TM/CTD in DMPC/D7PC bicelles (20%, q=0.3, 298K).

|      | WT (pH 6.5)    | WT(pH 4.0)      | CA     | CB     | CO      |
|------|----------------|-----------------|--------|--------|---------|
| T777 | (7.96,114.39)  | (7.969,114.036) | 61.902 | 69.203 | 175.314 |
| G778 | (8.30, 111.50) | (8.328,110.953) | 45.029 |        | 174.154 |
| E779 | (7.91,120.13)  | (8.018,119.823) | 55.441 | 29.103 | 175.703 |
| N780 | (8.36, 120.94) | (8.348,121.339) | 51.05  | 38.458 |         |
| P781 |                |                 | 63.159 |        | 177.196 |
| I782 | (7.92,120.23)  | (7.976,119.658) | 61.466 | 37.679 | 176.194 |
| Y783 | (7.77,123.26)  | (7.795,122.639) | 57.359 | 37.965 | 175.615 |
| K784 | (7.88,123.7)   | (7.919,123.218) | 55.915 | 32.452 | 176.213 |
| S785 | (8.08,117.77)  | (8.101,117.361) | 58.084 | 63.153 | 174.227 |
| A786 | (8.23,126.86)  | (8.26,124.944)  | 52.29  | 18.647 | 177.706 |
| V787 | (7.98,119.70)  | (8.012,119.249) | 62.081 | 32.014 | 176.425 |
| T788 | (8.10,118.85)  | (8.127,118.346) | 61.801 | 69.278 | 174.376 |
| T789 | (8.02,118.40)  | (8.049,118.053) | 61.743 | 69.333 | 174.203 |
| V790 | (8.06,124.30)  | (8.081,123.799) | 61.938 | 32.129 | 175.723 |
| V791 | (8.14,125.60)  | (8.161,124.983) | 61.774 |        | 175.297 |
| N792 | (8.43,124.72)  | (8.445,124.24)  | 50.818 | 32.085 |         |
| P793 |                |                 | 63.056 | 38.37  | 176.728 |
| K794 | (8.08, 121.19) | (8.106,120.668) | 56.027 |        | 176.266 |
| Y795 | (8.01,122.18)  | (8.031,121.635) | 57.483 | 31.914 | 175.705 |
| E796 | (8.16,124.33)  | (8.129,123.473) | 55.5   | 37.971 | 176.188 |
| G797 | (7.64,110.37)  | (7.639,109.858) | 45.008 | 29.024 | 172.914 |
| K798 | (7.65,126.18)  | (7.712,125.51)  | 56.909 | 32.847 |         |

**Supporting Table 2.** Backbone NMR resonance assignments for the membrane distal CTD of YY/FF  $\beta$ 1 TM/CTD in DMPC/D7PC bicelles (20%,  $q=0.3$ , 298K).

|      | YYFF (pH 6.5) | YYFF (pH 4.0)   | CA     | CB     | CO      |
|------|---------------|-----------------|--------|--------|---------|
| T777 | (7.96,114.38) | (7.878,113.757) | 62.242 | 69.68  | 175.25  |
| G778 | (8.30,111.50) | (8.271,110.842) | 45.364 |        | 173.947 |
| E779 | (7.92,120.19) | (7.947,119.496) | 55.687 | 29.33  | 175.462 |
| N780 | (8.36,120.93) | (8.265,121.31)  | 51.463 | 38.989 |         |
| P781 |               |                 | 63.669 | 32.107 | 176.948 |
| I782 | (7.92,120.19) | (7.923,119.586) | 61.985 | 38.286 | 176.028 |
| F783 | (7.87,123.23) | (7.795,121.87)  | 57.614 | 39.433 | 175.475 |
| K784 | (7.93,123.75) | (7.924,122.604) | 56.529 | 33.084 | 176.256 |
| S785 | (8.10,117.91) | (8.065,117.161) | 58.547 | 63.815 | 174.252 |
| A786 | (8.26,126.93) | (8.207,126.303) | 52.7   | 19.229 | 177.608 |
| V787 | (8.00,119.84) | (7.94,118.859)  | 62.56  | 32.589 | 176.335 |
| T788 | (8.12,118.99) | (8.039,117.865) | 62.154 | 69.649 | 174.407 |
| T789 | (8.03,118.47) | (7.965,117.672) | 62.123 | 69.72  | 174.106 |
| V790 | (8.07,124.41) | (7.984,123.314) | 62.31  | 32.691 | 175.672 |
| V791 | (8.16,125.74) | (8.061,124.365) | 62.192 | 32.671 | 175.236 |
| N792 | (8.44,124.78) | (8.34,124.037)  | 51.089 | 38.895 |         |
| P793 |               |                 | 63.517 |        | 176.86  |
| K794 | (8.08,121.11) | (8.046,120.294) | 56.556 | 32.488 | 176.465 |
| F795 | (8.08,122.14) | (7.99,120.832)  | 57.58  | 39.345 | 175.526 |
| E796 | (8.19,123.96) | (8.104,109.967) | 55.842 | 29.247 | 175.962 |
| G797 | (7.81,110.62) | (7.791,109.979) | 45.342 |        | 173.013 |
| K798 | (7.64,126.40) | (7.7,125.143)   | 57.025 | 33.544 |         |

**Supporting Table 3.** Backbone NMR resonance assignments for the membrane distal CTD of  $\beta 1$  TM/CTD YY/AA in DMPC/D7PC bicelles (20%, q=0.3, 298K).

|      | YYAA (pH 6.5)  | YYAA(pH 4.0)    | CA     | CB     | CO      |
|------|----------------|-----------------|--------|--------|---------|
| T777 | (7.97,114.47)  | (7.908,114.006) | 62.239 | 69.639 | 175.294 |
| G778 | (8.30, 111.61) | (8.263,111.094) | 45.346 |        | 173.957 |
| E779 | (7.93, 120.26) | (7.955,119.77)  | 55.672 | 29.352 | 175.476 |
| N780 | (8.36,120.95)  | (8.295,121.148) | 51.295 | 38.833 |         |
| P781 |                |                 | 63.453 | 32.015 | 176.889 |
| I782 | (7.96,121.09)  | (7.938,120.58)  | 61.188 | 38.376 | 176.015 |
| A783 | (8.05,128.42)  | (8.01,127.335)  | 52.414 | 19.18  | 177.574 |
| K784 | (7.93,123.75)  | (8.098,121.142) | 56.438 | 32.955 | 176.62  |
| S785 | (8.11,117.46)  | (8.083,117.042) | 58.254 | 63.858 | 174.119 |
| A786 | (8.22,126.98)  | (8.188,125.899) | 52.495 | 19.258 | 177.539 |
| V787 | (8.00,119.84)  | (7.944,119.452) | 62.333 | 32.656 | 176.33  |
| T788 | (8.12,118.99)  | (8.087,118.524) | 61.923 | 69.736 | 174.351 |
| T789 | (8.04,118.57)  | (8.002,118.026) | 61.873 | 69.81  | 174.064 |
| V790 | (8.09,124.60)  | (8.039,123.974) | 62.204 | 32.708 | 175.709 |
| V791 | (8.17,126.04)  | (8.105,124.643) | 62.17  | 32.671 | 175.312 |
| N792 | (8.47,124.76)  | (8.401,124.168) | 50.905 | 38.8   |         |
| P793 |                |                 | 63.548 |        | 177.009 |
| K794 | (8.24,121.00)  | (8.048,120.455) | 56.337 | 32.55  | 176.475 |
| A795 | (8.06,126.19)  | (7.956,124.46)  | 52.431 | 19.137 | 176.937 |
| E796 | (8.19, 123.96) | (8.094,119.845) | 56.088 | 29.24  | 176.523 |
| G797 | (8.31, 111.24) | (8.244,110.688) | 45.35  |        | 173.188 |
| K798 | (7.66, 126.52) | (7.697,124.735) | 56.999 | 33.436 |         |

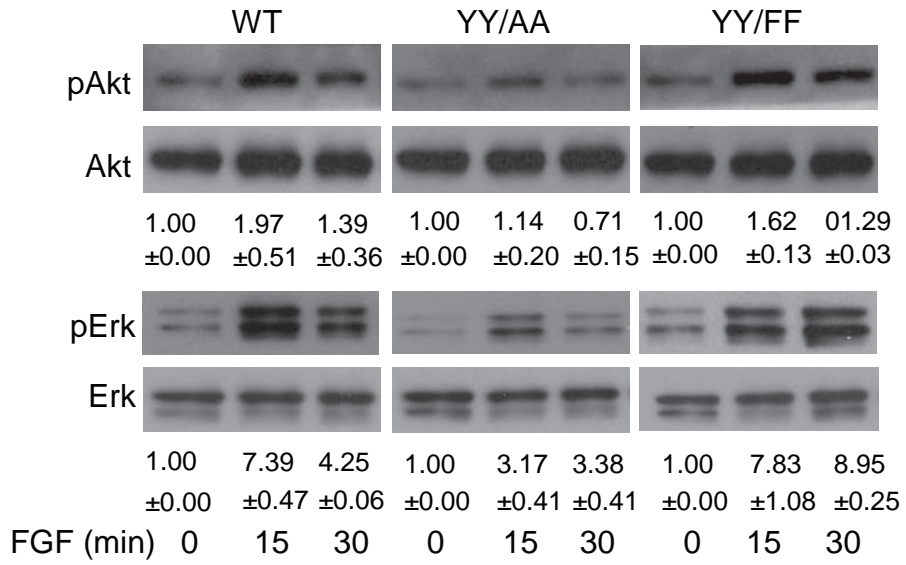

WT

YY/FF

Trichrome

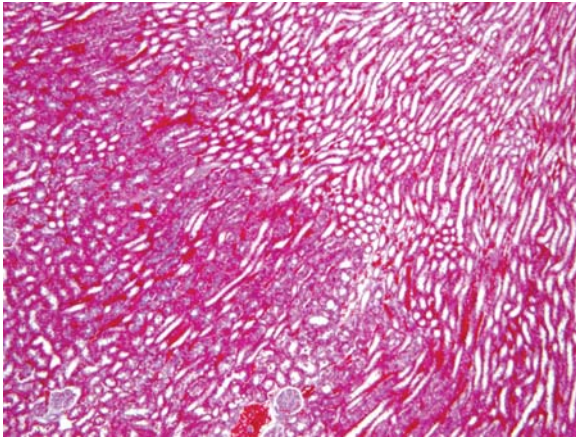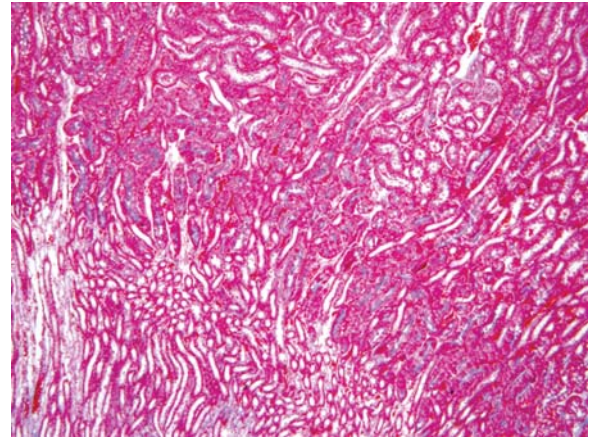



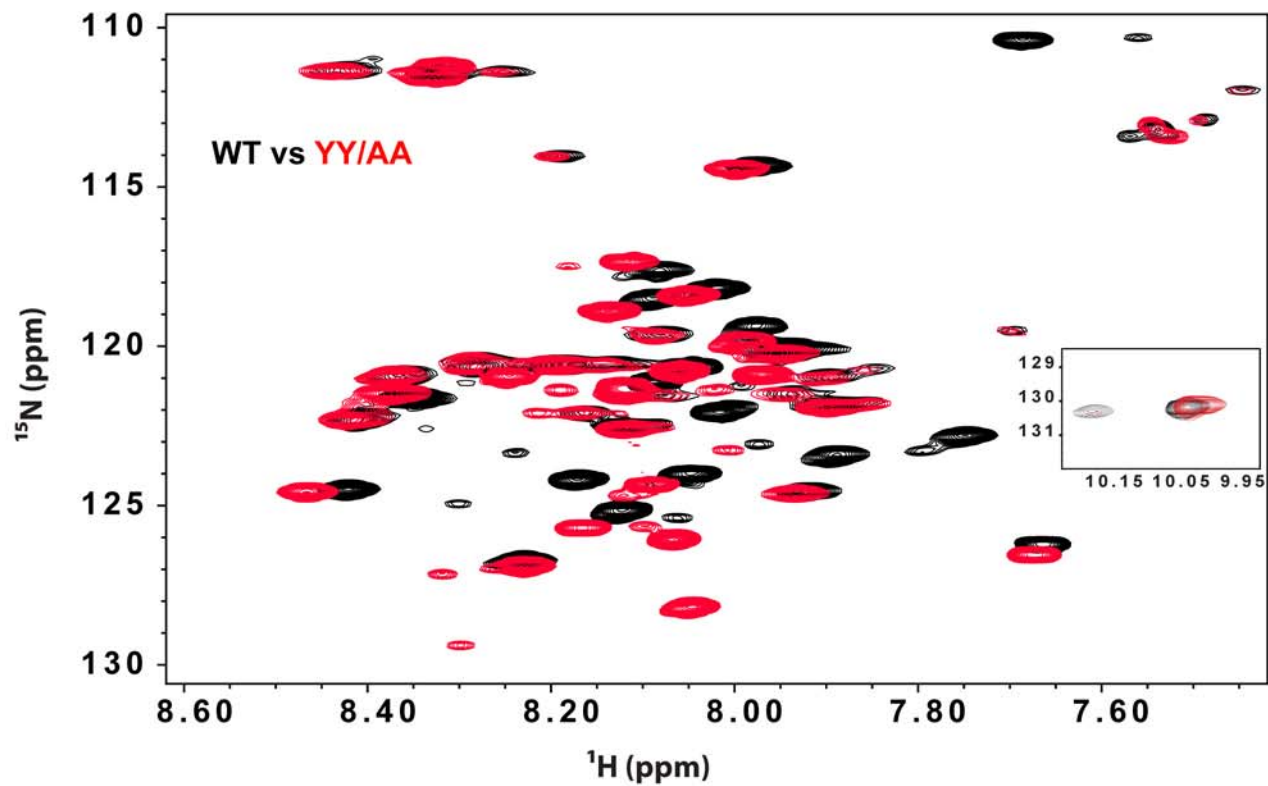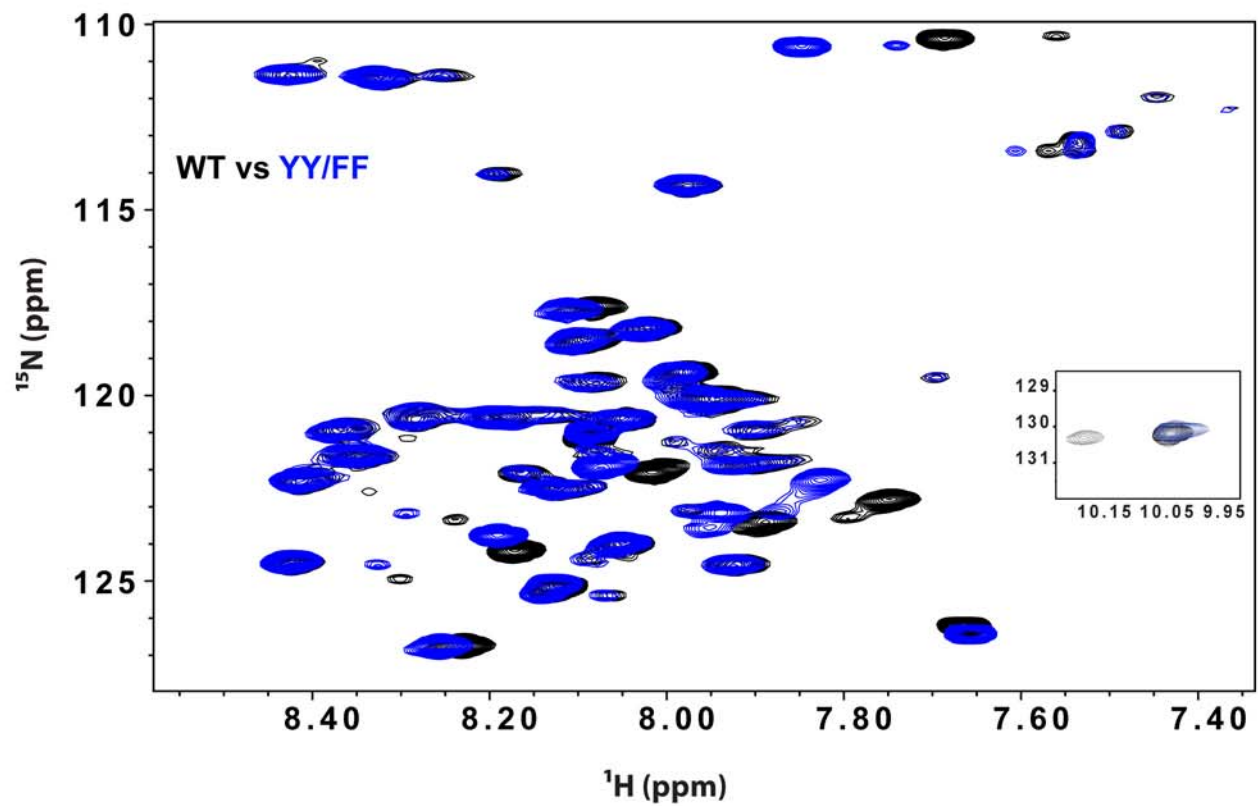

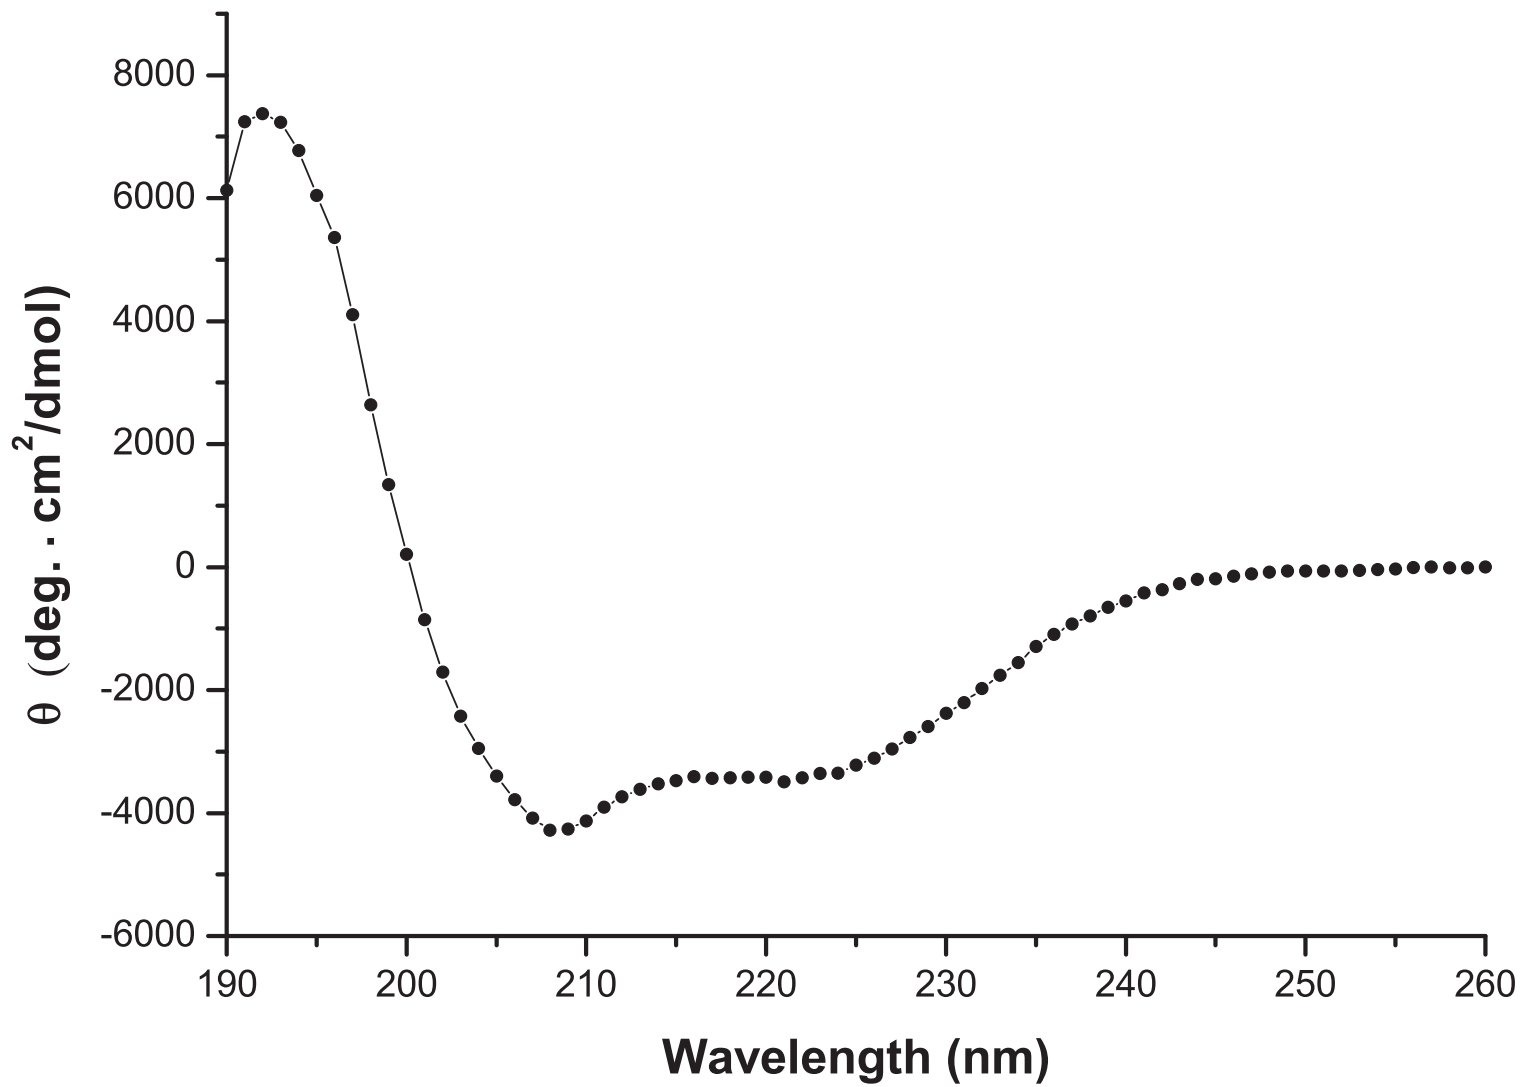

A) YY/AA titration with  $\alpha 2$ 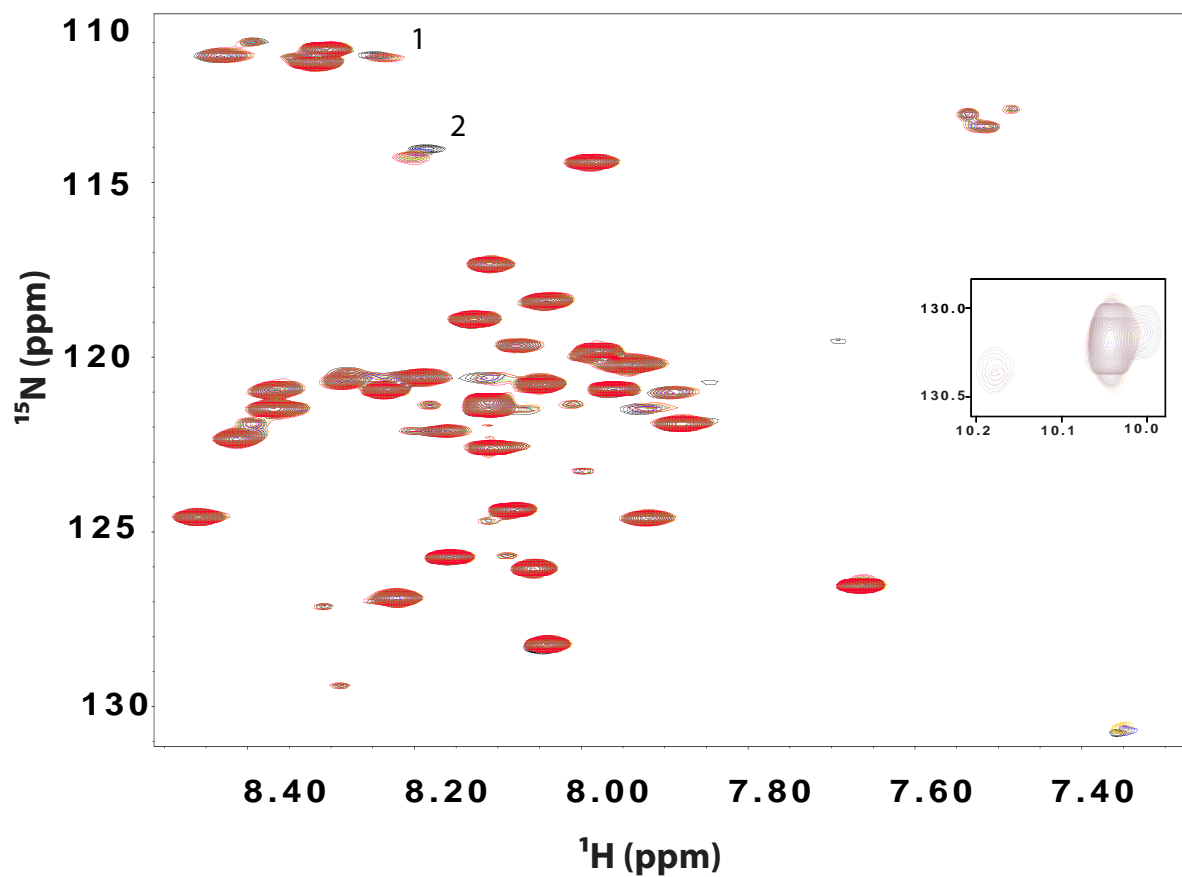B) YY/FF titration with  $\alpha 2$ 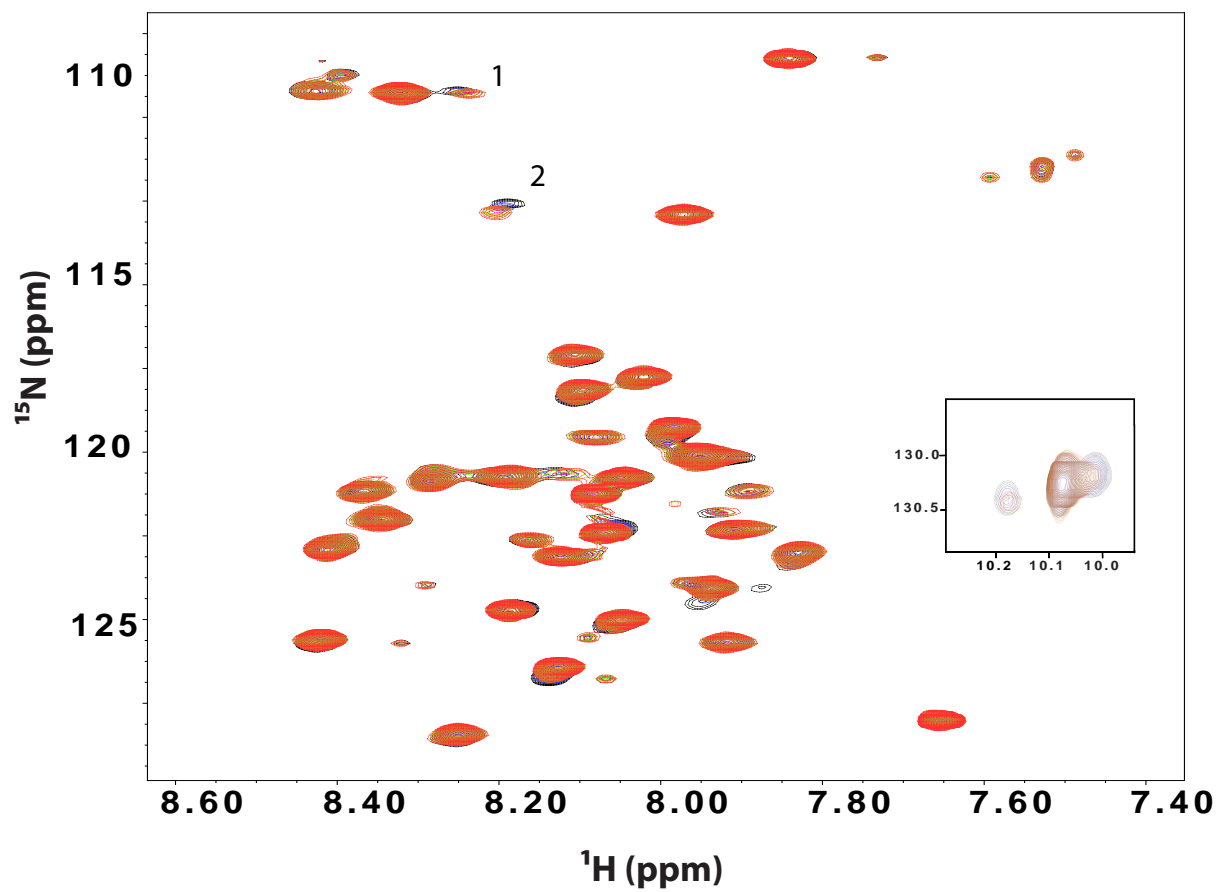

Supplement: MCB.00568-12_zmb999109681so1.pdf [file MCB.00568-12_zmb999109681so1.pdf]
